# Supplementary material for: SARS-CoV-2 ORF3a Induces Incomplete Autophagy via the Unfolded Protein Response
Source: MDPI journal article supplement (doi:10.3390/v13122467), 2021-12-09

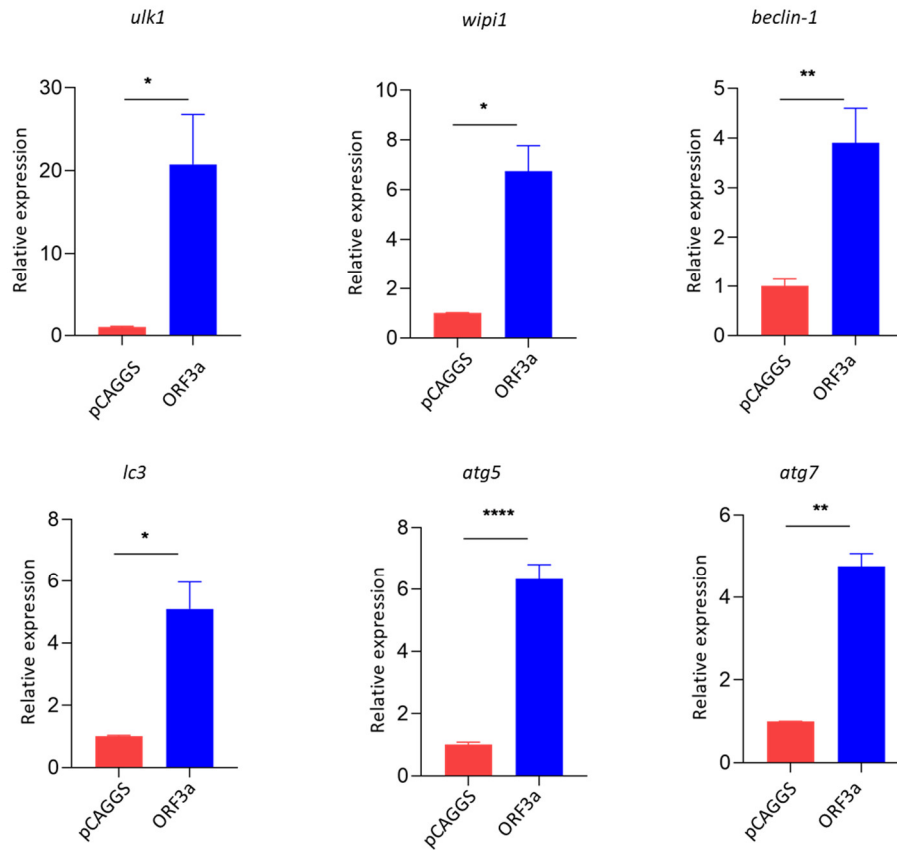

**Figure. S1. SARS-CoV-2 ORF3a promoted the expression of autophagy-related genes.**

Vero-E6 cells ( $1-2 \times 10^5$  cells) were transfected with HA-Tag-ORF3a (2  $\mu$ g) or empty vector (2  $\mu$ g) for 24 h. qPCR was performed to detect the expression level of *ULK1*, *WIP1*, *BECLIN-1*, *Atg5*, *Atg7*, and *LC3*.

Data were analyzed by T-tests or T-tests with Welch's correction. qPCR Data (mean  $\pm$  SEM) were representative of three independent experiments. (\* $p \leq 0.05$ , \*\* $p \leq 0.01$ , \*\*\*\* $p \leq 0.001$ )

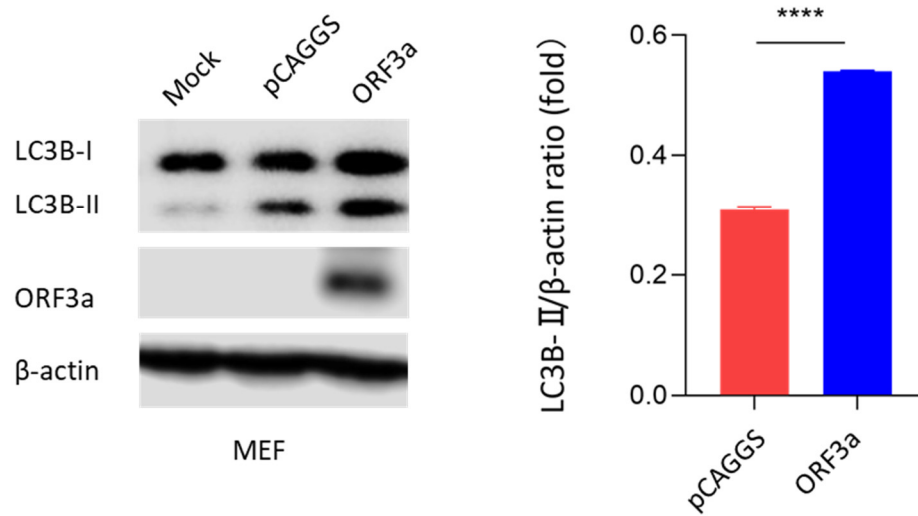

**Figure. S2. ORF3a could induce autophagy.**

MEF cells ( $1-2 \times 10^5$  cells) were transfected with HA-Tag-ORF3a (2  $\mu$ g) or empty vector (2  $\mu$ g) for 24 h. Western blot was performed to detect LC3B.

Data were analyzed by T-tests. Data were representative of three independent experiments. (, \*\*\*\* $p \leq 0.001$ )

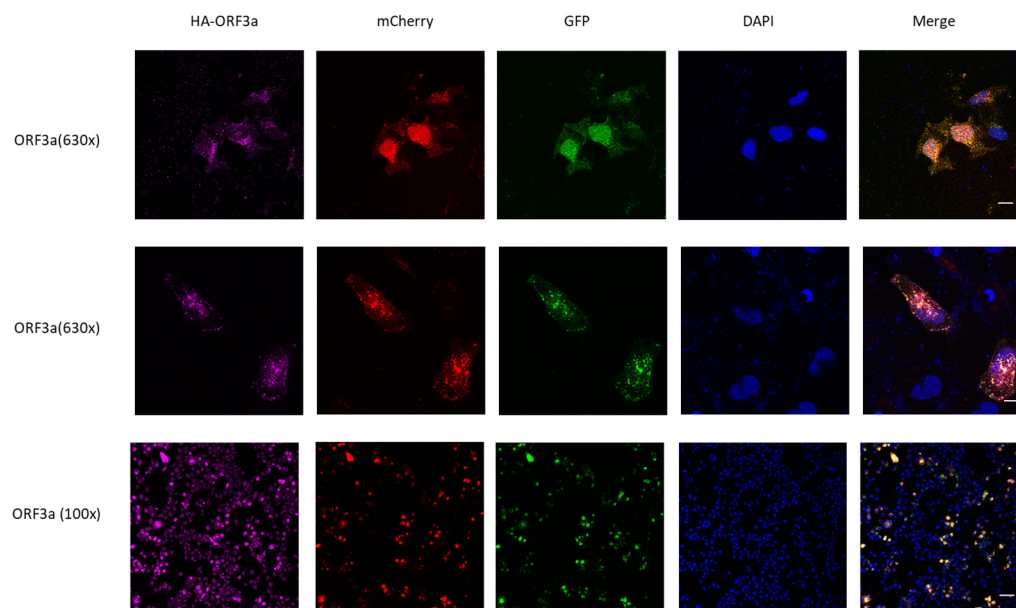

**Figure. S3. ORF3a-induced autophagy was an incomplete process.**

HeLa cells ( $1-2 \times 10^5$  cells) were co-transfected with mCherry-GFP-LC3B (1  $\mu$ g) and

HA-Tag-ORF3a (1  $\mu$ g) for 24 h. Immunofluorescence was performed to assess autophagy status. Scale bars: 4 $\mu$ m.

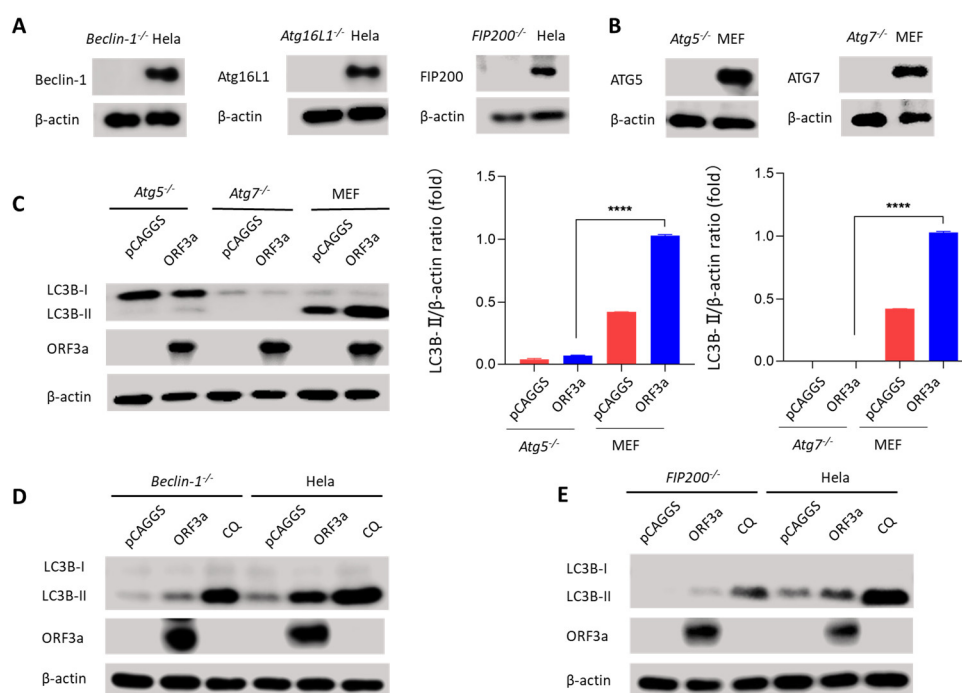

**Figure. S4. ORF3a-induced autophagy was classic.**

(A) *Beclin-1*, *Atg16L1*, and *FIP200* KO HeLa cells ( $1-2 \times 10^5$  cells) were lysed to verify successful knockout.

(B) *Atg5* and *Atg7* KO MEF cells ( $1-2 \times 10^5$  cells) were lysed to verify successful knockout.

(C) *Atg5* KO, *Atg7* KO, and WT MEF cells ( $1-2 \times 10^5$  cells) were transfected with HA-Tag-ORF3a (2  $\mu$ g) or empty vector (2  $\mu$ g) for 24 h. Western blot was performed to detect LC3B.

(D and E) HeLa cells ( $1-2 \times 10^5$  cells) and *Beclin-1* / *FIP200* KO HeLa cells ( $1-2 \times 10^5$  cells) were transfected with HA-Tag-ORF3a (2  $\mu$ g) or empty vector (2  $\mu$ g) for 24 h or treated with CQ (50 nM) for 6 h. Western blot was performed to detect LC3B.

One-way ANOVAs followed by Dunnett's multiple comparisons test were used in comparing multiple groups. Data were representative of 3 independent experiments.

(\*\*\*\* $p \leq 0.001$ )

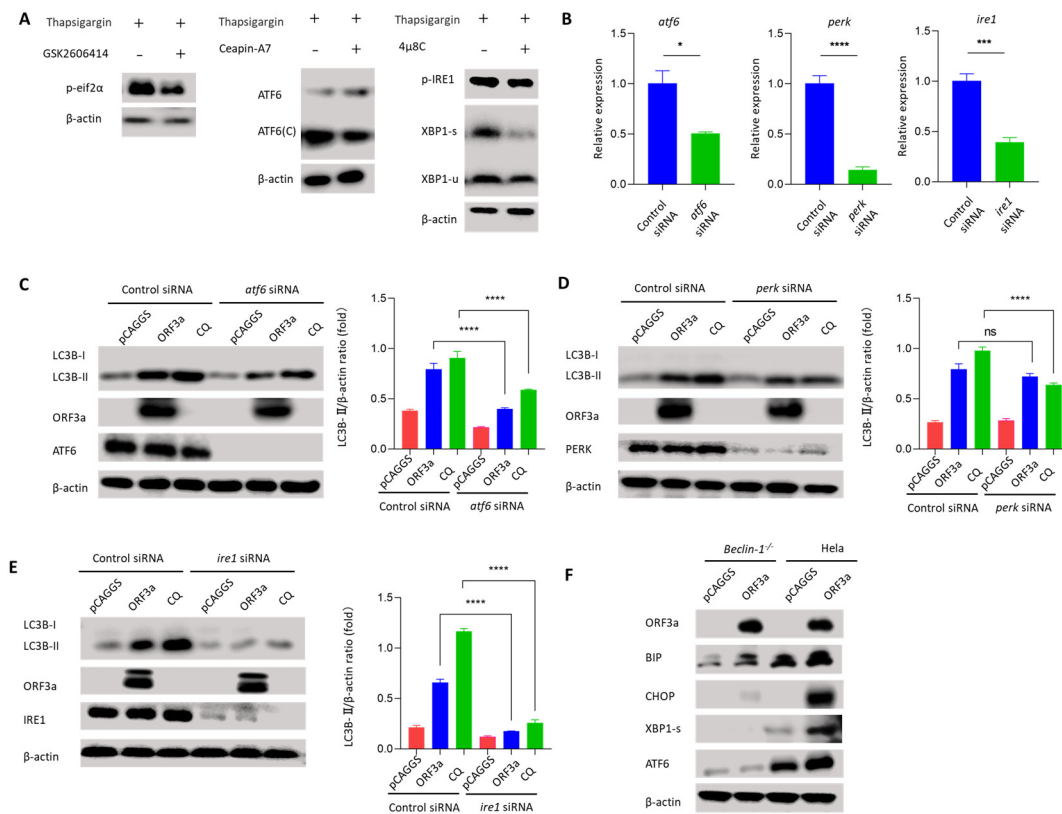

**Figure. S5. ORF3a induced autophagy through unfolded protein response.**

(A) 293T cells ( $1-2 \times 10^5$  cells) were pretreated with Ceapin-A7 (10 nM), GSK2606414 (5 nM), 4μ8C (10 nM) for 24 h and treated with Thapsigargin (2 μM) for 2 h before harvest. Western blot was performed to detect relative UPR proteins.

(B) HeLa cells ( $1-2 \times 10^5$  cells) were transfected with *atf6* / *perk* / *ire1* siRNA (50 nM) or control siRNA (50 nM) for 24 h. qPCR was performed to detect the expression level of *atf6*, *perk*, *ire1*.

(C, D and E) HeLa cells ( $1-2 \times 10^5$  cells) were transfected with HA-Tag-ORF3a (2 μg) or empty vector (2 μg) and *atf6* / *perk* / *ire1* siRNA (50 nM) or control siRNA (50 nM) for 36 h. HeLa cells ( $1-2 \times 10^5$  cells) were transfected with *atf6* / *perk* / *ire1* siRNA (50 nM) or control siRNA (50 nM) for 36 h and treated with CQ (50 nM) for 6 h before harvest. Western blot was performed to detect LC3B.

(F) HeLa cells ( $1-2 \times 10^5$  cells) and *Beclin-1* KO HeLa cells ( $1-2 \times 10^5$  cells) were transfected with HA-Tag-ORF3a (2 μg) or empty vector (2 μg) for 24 h Western blot was performed to detect relative UPR proteins.

Data were analyzed by T-tests or T-tests with Welch's correction. One-way ANOVAs followed by Dunnett's multiple comparisons test were used in comparing multiple groups. Data were representative of three independent experiments. ( $*p \leq 0.05$ ,  $***p \leq$

0.001, \*\*\* $p \leq 0.001$ )

**Supplementary Table S1.**

| Gene ID | Gene Symbol        | Species | Sequence 5' to 3'       |
|---------|--------------------|---------|-------------------------|
| 60      | <i>β-actin</i> -F  | human   | CATGTACGTTGCTATCCAGGC   |
| 60      | <i>β-actin</i> -R  | human   | CTCCTTAATGTCACGCACGAT   |
| 8408    | <i>ULK1</i> -F     | human   | GGCAAGTTCGAGTTCTCCCG    |
| 8408    | <i>ULK1</i> -R     | human   | CGACCTCCAAATCGTGCTTCT   |
| 9474    | <i>ATG5</i> -F     | human   | AAAGATGTGCTTCGAGATGTGT  |
| 9474    | <i>ATG5</i> -R     | human   | CACTTTGTCAGTTACCAACGTCA |
| 10533   | <i>ATG7</i> -F     | human   | CAGTTTGCCCCTTTTAGTAGTGC |
| 10533   | <i>ATG7</i> -R     | human   | CCAGCCGATACTCGTTCAGC    |
| 8678    | <i>Beclin-1</i> -F | human   | CCATGCAGGTGAGCTTCGT     |
| 8678    | <i>Beclin-1</i> -R | human   | GAATCTGCGAGAGACACCATC   |
| 81631   | <i>LC3</i> -F      | human   | GATGTCCGACTTATTCGAGAGC  |
| 81631   | <i>LC3</i> -R      | human   | TTGAGCTGTAAGCGCCTTCTA   |
| 9776    | <i>ATG13</i> -F    | human   | TTGCTATAACTAGGGTGACACCA |
| 9776    | <i>ATG13</i> -R    | human   | CCCAACACGAACTGTCTGGA    |
| 55062   | <i>WIP1</i> -F     | human   | ACTAAAGCCGGGTATAAGCTGT  |
| 55062   | <i>WIP1</i> -R     | human   | CGGGATTTCATTGCTTCCGTG   |
| 22241   | <i>ULK1</i> -F     | mouse   | AAGTTCGAGTTCTCTCGCAAG   |
| 22241   | <i>ULK1</i> -R     | mouse   | ACCTCCAGGTCGTGCTTCT     |
| 56208   | <i>Beclin-1</i> -F | mouse   | ATGGAGGGGTCTAAGGCGTC    |
| 56208   | <i>Beclin-1</i> -R | mouse   | TGGGCTGTGGTAAGTAATGGA   |
| 55062   | <i>WIP1</i> -F     | mouse   | CTGCTTCTCTTTCAACCAAGACT |
| 55062   | <i>WIP1</i> -R     | mouse   | ACGTCAGGGATTTCATTGCTT   |
| 67443   | <i>LC3</i> -F      | mouse   | TTATAGAGCGATACAAGGGGGAG |
| 67443   | <i>LC3</i> -R      | mouse   | CGCCGTCTGATTATCTTGATGAG |
| 74244   | <i>ATG7</i> -F     | mouse   | TCTGGGAAGCCATAAAGTCAGG  |
| 74244   | <i>ATG7</i> -R     | mouse   | GCGAAGGTCAGGAGCAGAA     |
| 11793   | <i>ATG5</i> -F     | mouse   | TGTGCTTCGAGATGTGTGGTT   |
| 11793   | <i>ATG5</i> -R     | mouse   | ACCAACGTCAAATAGCTGACTC  |
| 11461   | <i>β-actin</i> -F  | mouse   | GGCTGTATTCCCCTCCATCG    |
| 11461   | <i>β-actin</i> -R  | mouse   | CCAGTTGGTAACAATGCCATGT  |
| 22926   | <i>ATF6</i> -F     | human   | TCCTCGGTCAGTGGACTCTTA   |
| 22926   | <i>ATF6</i> -R     | human   | CTTGGGCTGAATTGAAGGTTTGT |
| 9452    | <i>PERK</i> -F     | human   | ACGATGAGACAGAGTTGCGAC   |
| 9452    | <i>PERK</i> -R     | human   | ATCCAAGGCAGCAATTCTCCC   |
| 2081    | <i>IRE1</i> -F     | human   | CACAGTGACGCTTCCTGAAAC   |
| 2081    | <i>IRE1</i> -R     | human   | GCCATCATTAGGATCTGGGAGA  |

**Supplementary Table S2.**

| Gene ID | Gene Symbol        | Species | Sequence 5' to 3'      |
|---------|--------------------|---------|------------------------|
| 9452    | <i>Siperk-1</i> -F | human   | GCCAUAAUGGACAUAGUGATT  |
| 9452    | <i>Siperk-1</i> -R | human   | UCACUAUGUCCAUAUUGGCTT  |
| 9452    | <i>Siperk-2</i> -F | human   | CAAUCUUGCAGUAUCCAUAATT |
| 9452    | <i>Siperk-2</i> -R | human   | UAUGGAUACUGCAAGAUUGTT  |

|       |                   |       |                        |
|-------|-------------------|-------|------------------------|
| 9452  | <i>siperk-3-F</i> | human | CCUCAAGCCAUCCAACAUAUU  |
| 9452  | <i>siperk-3-R</i> | human | AAUAUGUUGGAUGGCUUGAGG  |
| 2081  | <i>siirel-1-F</i> | human | CCCAUCAACCUCUCUUCUGUA  |
| 2081  | <i>siirel-1-R</i> | human | UACAGAAGAGAGGUUGAUGGG  |
| 2081  | <i>siirel-2-F</i> | human | CAUCGUUCACAGAGACCUATT  |
| 2081  | <i>siirel-2-R</i> | human | UAGGUCUCUGUGAACGAUGTT  |
| 2081  | <i>siirel-3-F</i> | human | CGAUCGUGAAGCAGUUAGATT  |
| 2081  | <i>siirel-3-R</i> | human | UCUAAACUGCUUCACGAUCGTT |
| 22926 | <i>siatf6-1-F</i> | human | GCAGCAACCAAUUAUCAGUUU  |
| 22926 | <i>siatf6-1-R</i> | human | AAACUGAUAAUUGGUUGCUGC  |
| 22926 | <i>siatf6-2-F</i> | human | GCUGGAUGAAGUUGUGUCATT  |
| 22926 | <i>siatf6-2-R</i> | human | UGACACAACUUCAUCCAGCTT  |
| 22926 | <i>siatf6-3-F</i> | human | GGUUCAUAGACAUGAAGUATT  |
| 22926 | <i>siatf6-3-R</i> | human | UACUUCAUGUCUAUGAACCTT  |

### Supplementary clone map.

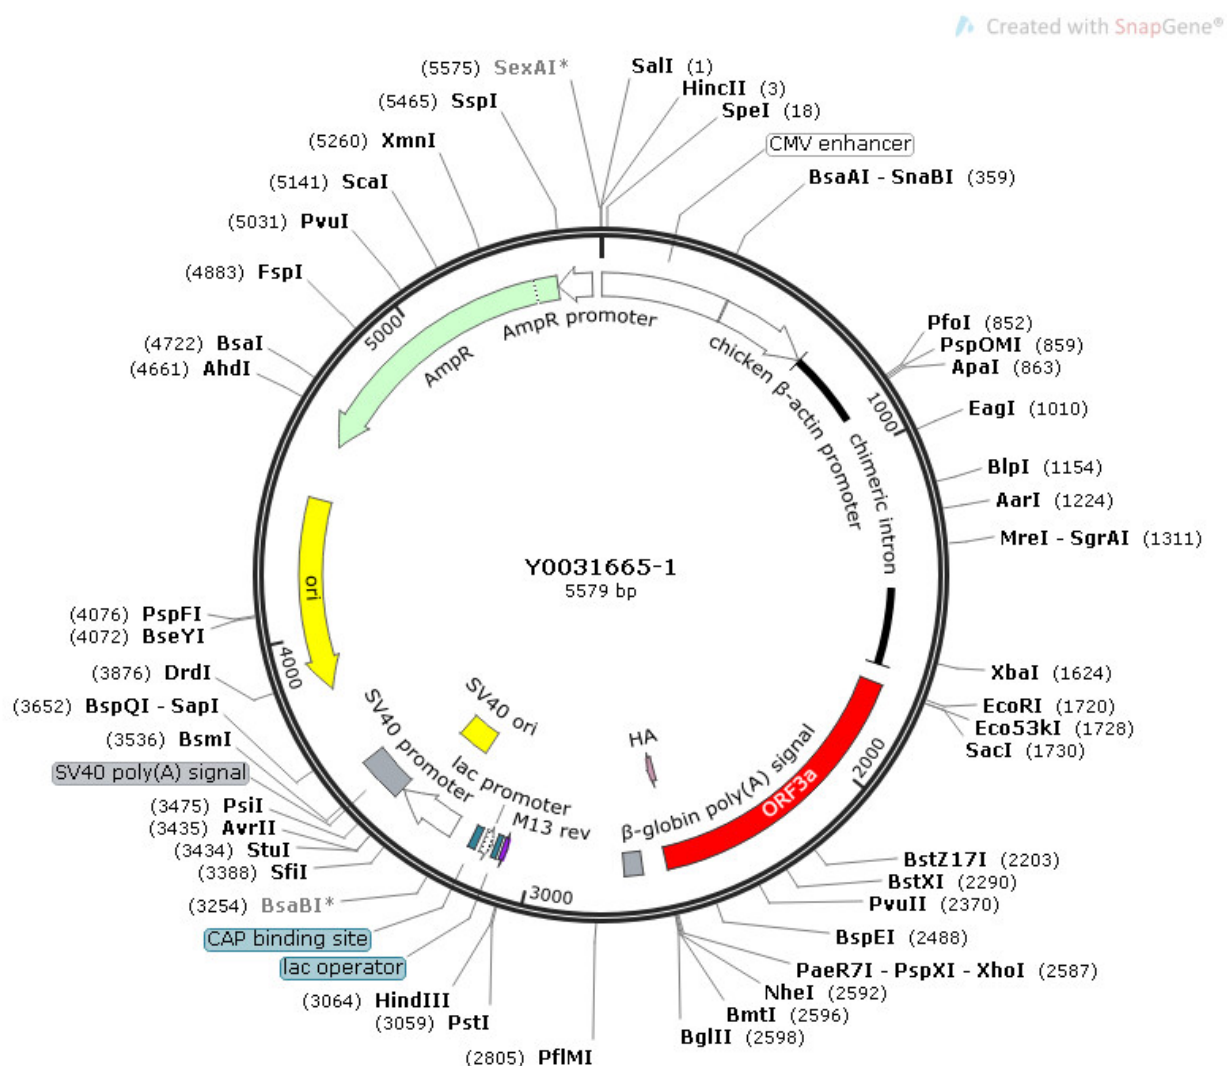

Supplement: s1 [file s1]
